# Supplementary material for: Evolutionary analysis of chloroplast tRNA of Gymnosperm revealed the novel structural variation and evolutionary aspect
Source: PubMed Central journal article supplement (PMC7698693; doi:10.7717/peerj.10312), 2020-11-25

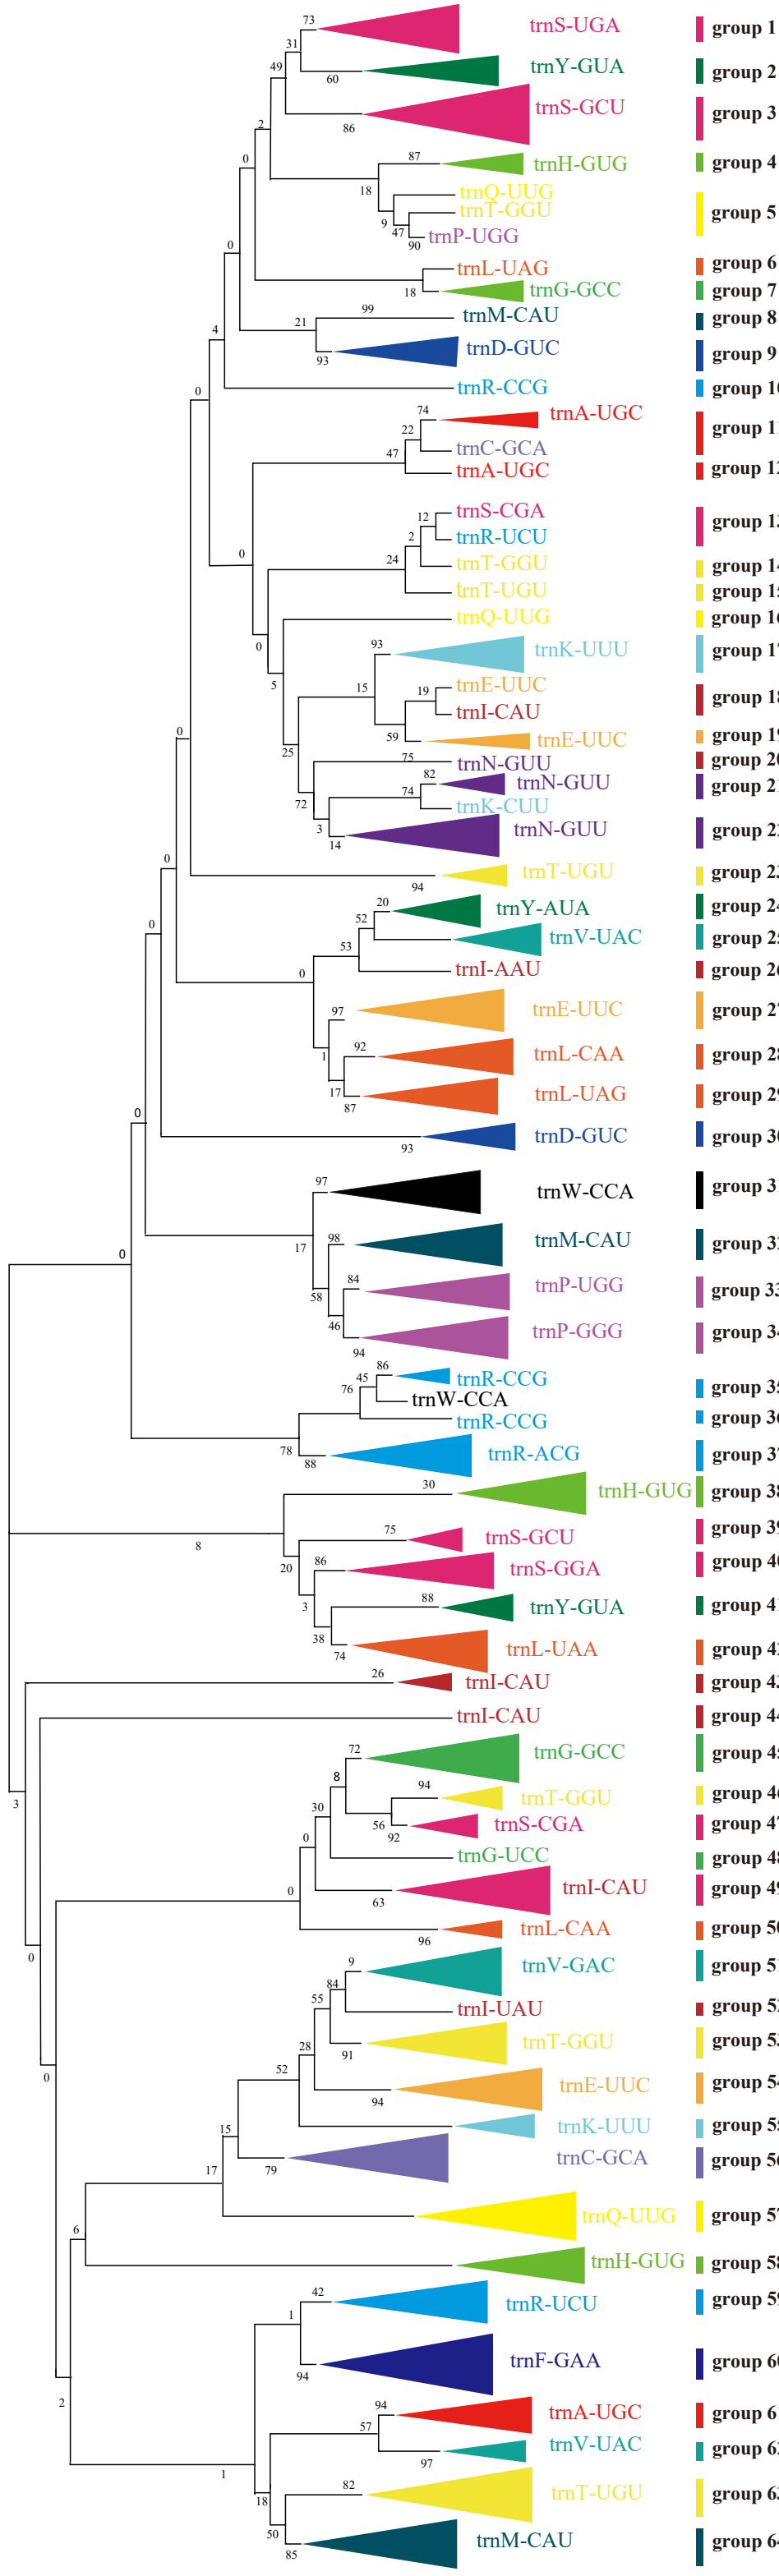

Supplement: peerj-08-10312-s002.pdf [file peerj-08-10312-s002.pdf]
