# Supplementary material for: Evolutionary analysis of chloroplast tRNA of Gymnosperm revealed the novel structural variation and evolutionary aspect
Source: PubMed Central journal article supplement (PMC7698693; doi:10.7717/peerj.10312), 2020-11-25
Supplement: peerj-08-10312-s004.pdf [file peerj-08-10312-s004.pdf]

*C. debaensis*  
*S. verticillata*  
*D. spinulosum*  
*C. lanceolata*  
*G. biloba*  
*F. mairei*  
*C. deodara*  
*W. mirabilis*  
*G. nobilis*  
*R. piresii*  
*E. equisetina*

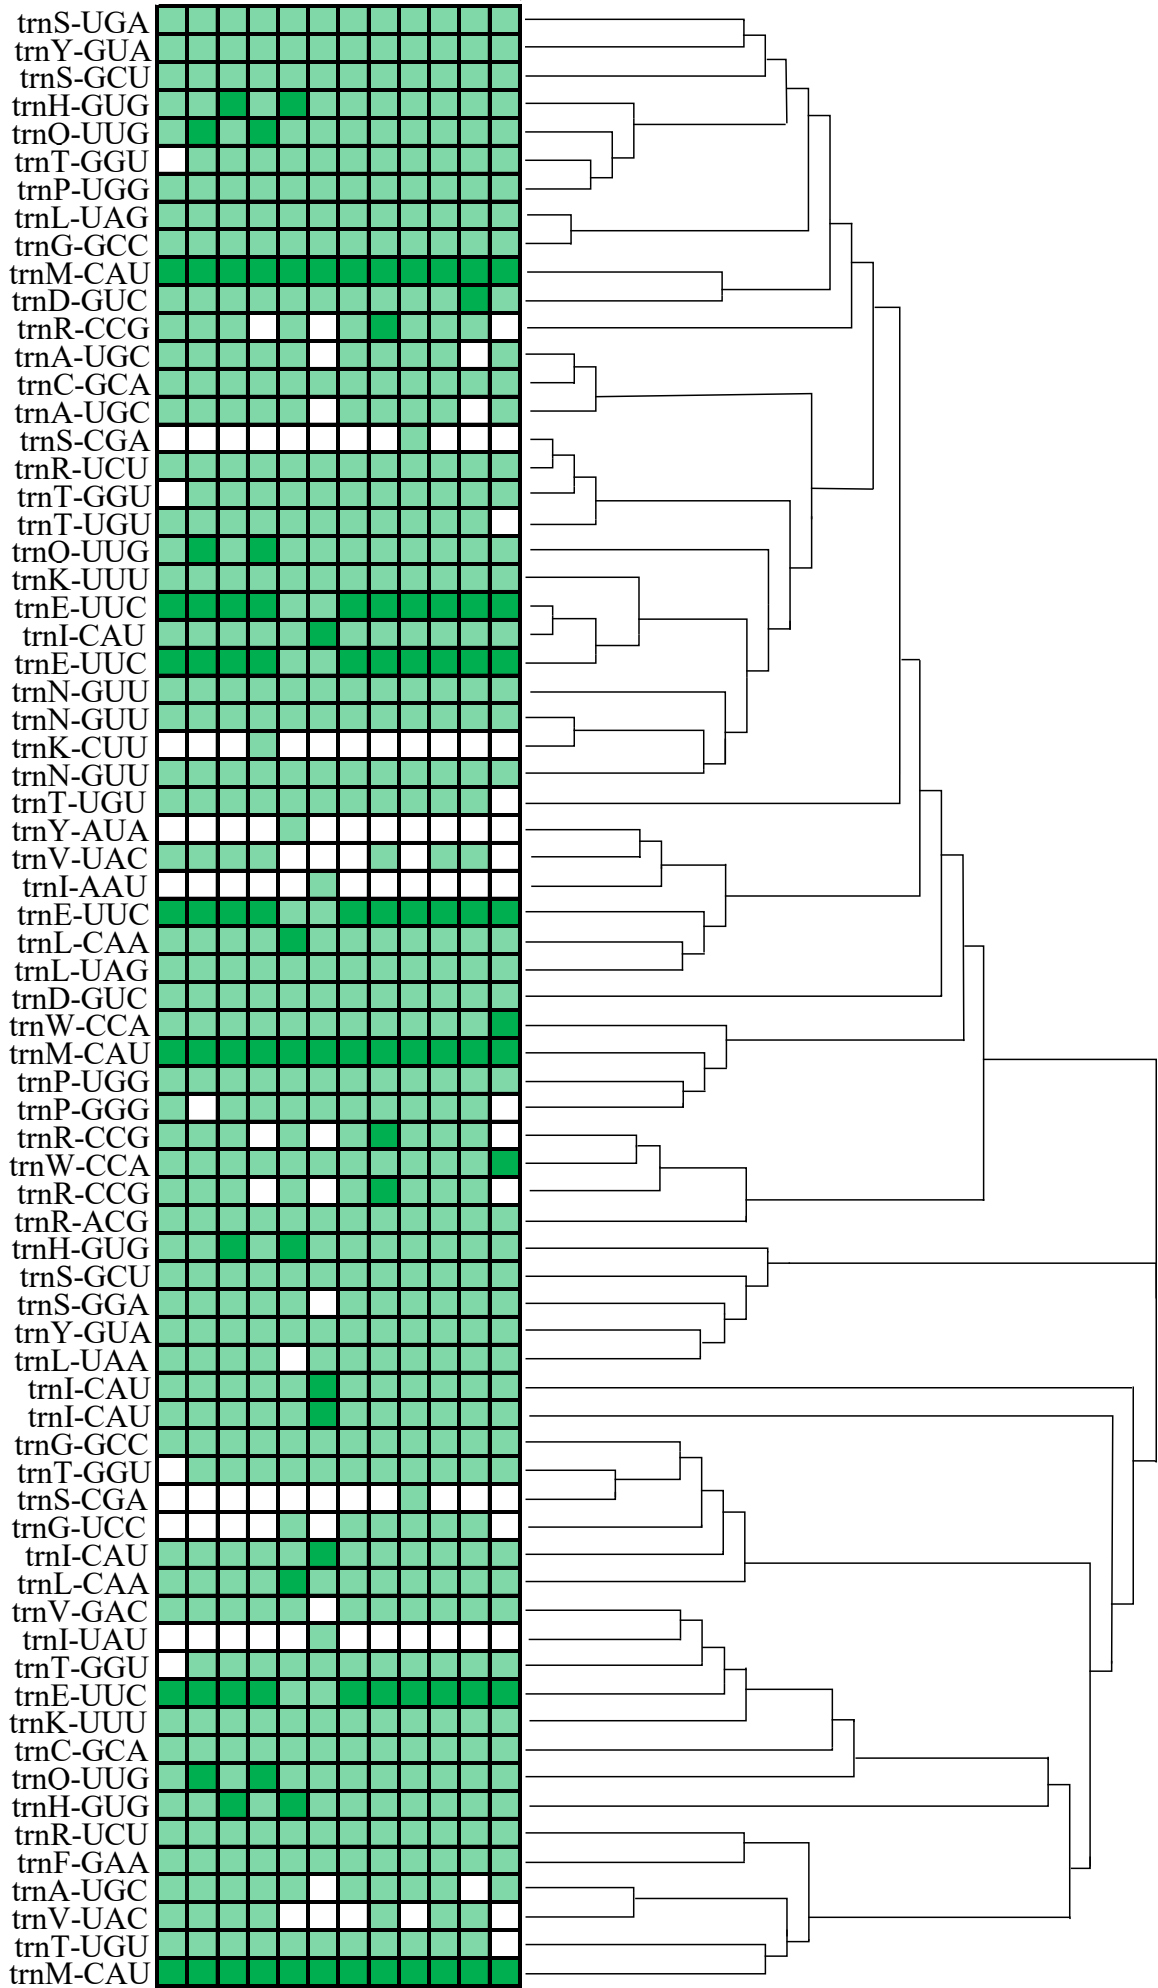

represents the presence of one copy of tRNA genes  
 represents the presence of two copies of tRNA genes  
 represents the absence of tRNA genes
